# Supplementary material for: Cloning, Characterization, and Overexpression in Arabidopsis to Determine the Function of SPL Genes from Woodland Strawberry (Fragaria Vesca)
Source: Research Square preprint supplement (doi:10.21203/rs.3.rs-620026/v1), 2021-06-24
Supplement: Supplementary file 1 [file 8f2c623aab8f0bcc9f9994e5.xls]

## Sheet: Sheet1
Primers used in this study
Primer name	Primer sequence	Notes
FvSPL1-F1	ATGGAGAGGCAAACTTGGAAAGAA	PCR primer amplifying FvSPL1
FvSPL1-R1	TTAGCAGAGTTTCCTGGGGGCTGG
FvSPL2-F1	ATGAAGACAAGGGAACATATGGAA	PCR primer amplifying FvSPL2
FvSPL2-R1	TCAGTTGGGATAATCGGAGGAGTT
FvSPL11-F1	ATGGCAGAGAGTAAGAGCAAG	PCR primer amplifying FvSPL11
FvSPL11-R1	TTATCTGATTTGGAAATGCTTATT
FvSPL1-F2	aaagtcgacATGGAGAGGCAAACTTGGAAAG	Transgene primer for FvSPL1
FvSPL1-R2	aaactagtTTAGCAGAGTTTCCTGGGGGCTGG
FvSPL2-F2	aaagtcgacATGAAGACAAGGGAACATAT	Transgene primer for FvSPL2
FvSPL2-R2	aaactagtAGTTGGGATAATCGGAGGAGTT
FvSPL11-F2	aaagtcgacATGGCAGAGAGTAAGAGCA	Transgene primer for FvSPL11
FvSPL11-R2	aaactagtTCTGATTTGGAAATGCTTATT
FvSPL1-F3	aaagtcgacATGGAGAGGCAAACTTGGAAAGAA	Prokaryotic expression for FvSPL1
FvSPL1-R3	aagcggccgcTTAGCAGAGTTTCCTGGGGGCTGG
FvSPL1-F4	atcgccgaccggtaggcctATGGAGAGGCAAACTTGGAAAGAA	pBD for Dual-Luciferase assay
FvSPL1-R4	gaaaccagagttaaaggcctTTAGCAGAGTTTCCTGGGGGCTGG
FvSPL1-F5	tgcccaaattcgcgaccggtATGGAGAGGCAAACTTGGAAAGAA	pEAQ for Dual-Luciferase assay
FvSPL1-R5	aaaacccgggTTAGCAGAGTTTCCTGGGGGCTGG
FvAP1-F	tatagggcgaattgggtaccGATTATGAGTTCGACTCACGAAGTTG	0800 for Dual-Luciferase assay
FvAP1-R	gtttttggcgtcttccatggATTGATGATAAATATTTCTACCTGAATC
FvAP1-F-wild	CAGATAGATCAGTACTTAAATCCTTCCAAGTCCCAAATATGGCCTTGCTGTAATAATTACTTTTACTGTACTTAGTTAACCAA	EMSA
FvAP1-R-wild	TTGGTTAACTAAGTACAGTAAAAGTAATTATTACAGCAAGGCCATATTTGGGACTTGGAAGGATTTAAGTACTGATCTATCTG
FvAP1-F-m	CAGATAGATCAAAAATTAAATCCTTCCAAGTCCCAAATATGGCCTTGCTGTAATAATTACTTTTACTAAAATTAGTTAACCAA	EMSA
FvAP1-F-m	TTGGTTAACTAATTTTAGTAAAAGTAATTATTACAGCAAGGCCATATTTGGGACTTGGAAGGATTTAATTTTTGATCTATCTG
AtFUL	ATGATGGAACTCCGTTGTCG	qRT-PCR
AtFUL	TTCATGAGAAATCATTACCAAGATATG
AtCO	TCCATGGAAACTGGTGTTGTGC	qRT-PCR
AtCO	TTGCAGGGTCAGGTTGTTGCTC
AtAGL42	TCATGAAACCAGCAATCACGACTCA	qRT-PCR
AtAGL42	AGCCTTTCTTTCTCGGACCTTTCC
AtLFY	ACAAGACCAGACTGATGCG	qRT-PCR
AtLFY	CTACCTCCGTTGCCGTTATC
AtAP1	AAAAGGAGAAGGCCATACAGG	qRT-PCR
AtAP1	TGAGAAAAGGAGATGGCTGATG
AT-β-TUBULIN2	GAGCCTTACAACGCTACTCTGTCTGTC	qRT-PCR
At-β-TUBULIN2	ACACCAGACATAGTAGCAGAAATCAAG
